# Supplementary material for: Integrating reflection into a mobile-assisted reading program for learning English as a second language in China
Source: Frontiers journal article supplement (doi:10.3389/feduc.2022.1067523), 2023-01-17
Supplement: Data_Sheet_1.docx [file Data_Sheet_1.docx]

S1

T: Today we talked a little about your opinion about this reading program and reading reflection. Let us see the first question, do you think whether we need a certain kind of mobile reading supervision, or is actually a process management. Or do we just need a kind of, say, daily check-in.

S1: well, I think mobile reading is a convenient new mode of reading practice compared with the traditional paper reading. We can access reading materials easily via mobile devices. But I don’t think you need to supervise this learning process intentionally. One advantage of mobile reading is that it allows students the freedom to study at will. We may acquire the knowledge we need when I want to study and read. Supervision is not really necessary as for me it feel like reading for reading intentionally, which diverted from the fundamental goal of reading. Convenience and casualness, two main features of mobile reading, are thus lost under supervision in mobile reading.

T: Yes, I agree. The biggest advantage of mobile reading is the freedom it allows readers in the learning process. The supervision we had or the check-in function in many apps may be better terms as a kind of process management methods. The main objective is to stimulate us to be exposed to English reading materials. Then maybe during the process, you discovered some good apps or good resources and formed a habits of reading on these apps or learning through these materials. If we are forced to study under supervision, we are very unlikely to continue the learning behavior once the supervision is loosen.

S1: Yes. For us a common understanding is that interest is most important stimulus for study. You will be devoted to it wholeheartedly only if you have interest in it.

T: Yes, that is an important point. Then a second question, do you think reflection after mobile reading is useful or not?

S1: I think it is necessary of mobile reading. For example, when you finish an argumentative essay or other essay, you need to understand what message the writer wanted to convey. Then you need to reflect what you learned from the passage and how you can apply what you learn in your study or work. If you only read without reflection, then you only receive the message in the article, nothing else ,without any meaning.

T: yes, I agree. Without reflection what we read can’t be understand very deeply, maybe only the surface meaning is caught.

T: So sometimes If we read sth, writing a simple reflection, no matter how much you write, is beneficial to us. Nowadays one of the biggest problem facing us is that we read and write less. I think this is a kind of degrading compared with the past.

S1: the pace of life is so fast that it is hard for us to calm down and be devoted to study or work wholeheartedly.

T: let's look at the second problem, let us rank a sequence of the four modes we have used—paper journal, e-journal, audio reflection, and collaborative reflection.

S1: the most favored mode is collaborative reflection. Next is the paper journal, the third is the audio reflection and the least favored is the e-journal reflection

T: ok, I see. Then could you explain a little why you favor collaborative reflection the most?

S1: For collaborative reflection, it involved the sharing of ideas among different group members. The fierce discussion and the clash of ideas will benefit group members a lot.

T: Yes, I agree. We can gain understandings from different perspectives with an in-depth discussion and collaboration.

S1: Yes. One person’s mind may be limited in understanding, but in group discussion and collaboration, their minds might become active and divergent. We may gain much from other’s understanding and perspectives.

S1: handwriting and typing are two different ways of imput. Nowadays a common phenomenon is that we often forget how to spell words as we always use typing instead of writing on papers. Paper reflection, however, can help us reflect what we learned as well as practicing spelling of words and deepen our memory. For e-journal reflection, due to the convenient input method on smartphone or mobile devices, you only need to type the first two letters and then the whole words will appear for your choice. Thus in the long time it will result in the degrading of my spelling ability.

T: Another factor for this problem is that typing is not widely applied in our campus life. In addition, other online functions such as editing or spelling/grammar correction are not widely used. For foreigners they are used to typing in their work and life except for personal letters. Besides the software we used is not powerful enough.

S1: yes, it is.

T: ok, so much for this problem. You enlightened me in several ways. Handwriting really deserves our attention as it is a practical ability of yours. Then the third one, in the process of completing reflection, have you encountered any problems?

S1:I think there are advantages and disadvantages concerning mobile reading. The good part is that it is convenient as you can read any time or place you like. But the problem is also obvious and serious—the distraction problem. I am often devoted to the paper book I am reading as the book is only for reading. But Mobile devices performs various functions such as communication, entertainment, work and study. Then it is hard for you to focus on reading with such as multi-function devices.

T: yes, this is a very big problem facing all mobile learners. We need to find ways to deal with it or lessen its effect on learners.

S1: Concerning mobile reading, I think the reading materials should be limited to certain scopes. Teachers may recommend some good articles for students to read. There are too many learning resources online and it is hard to find suitable reading materials. For example, reading materials about college life or college students will be more likely accepted and welcomed by college learners.

T: very good idea! Students enjoy the freedom to choose what they study, but limited freedom for material selection may be better. It takes a lot of time and energy to distinguish and select proper reading passages. Sometimes the passage chosen turned out to be uninteresting or meaningless.

S1: yes, that is it. I think some good articles could be selected and shared for students to appreciate them. This will be very beneficial.

T: Okay, I get it, so let's see if there are any suggestions or ways to improve this reading program or this mode of reading reflecting.

S1: well I think reflection is a very important step in learning process. For reading reflection, I think it can start from individual reflection by reflecting on what you gained and get from the passage. Then a group discussion may be held for a group reflection for understandings from different perspective. After that a class reflection may be carried out to summarize the different ideas for inspiration. Such a multi-layer reflection process will benefit a lot I think.

T: good idea. You inspired me a lot. Thank you for your suggestions.

S2

T: Then we mainly say, that is, a little bit about the personal feelings on line, the first, do you think whether we need a certain kind of mobile reading supervision, or is actually a process management. Or do we just need a kind of, say, daily check-in.

S2: I think, um, that depends. Well, if one is really interested in it, he doesn't need to be monitored. If he is forced or, um, not by his own will, one may need some monitoring.

T: Well, do you think we have this kind of habits now about going to read things on the internet by ourselves?

S2: Well, yes. Yeah. There are a lot of people who like to watch short films about history or, um, science fiction or something like that. This kind of fiction-like reading, um, that's good to read in this way.

T: Well, yes, in fact, I think we should have such a habit, in fact, all the hard work we have done, is for the purpose that we can help you develop a habit like this. As long as there is this habit, there will be constant contact. In fact, if there is no such habit, any such external measures are actually useless and will be counterproductive. if you impose such things on students, you are likely to revoke rebellious feeling among students, but it is not useful. Then so much for this question.

T: Well, there's another problem, is there any use for this kind of reflection after reading the article? Especially after we read this kind of English article, if it is necessary to do this kind of reflection activity?

S2:I think yes, definitely, there is some necessity to reflect on reading process, because um, the first thing is that for English, it is not a language that we come into contact with very often, um unfamiliar language, so when you read the article, you may not understand very well what he is saying, maybe you read and understand the meaning of each sentence, but when you put it together then, it will not form a system, um, so reflecting on the words or texts is definitely enhancing or strengthening the understanding of the article, very important part, um.

T:Yes, in fact I also think so, that now in fact we are still poor readers, especially if in the future you want to read some, for example, more professional or technical passages. In our general reading class, students will read some classic novels or articles, then you will find each word you may know, or every sentence you can translate out, but you can’t understand what the whole passage mean.

Well, one needs to understand the whole thing. And then in addition you may also need a little, deeper understanding for certain detailed part. The first thing you need to do is to have a deeper understanding of some of the points and so on. This may need us to constantly to remember some things and notetaking are necessary at times. you can simply remember, for example, after reading this paragraph, what the writer wanted to convey. Maybe after summarizing it, you may have a better understanding. Anyway, what we write, is called reading reflection journal, in fact, the biggest a role is to deepen your memory. Another is to strengthen your understanding of the whole article. It is easy to forget when we read more, so reflection at different stage may help us remember and understand the passage better.

S2: Well, yes, that's it. I think the memory of a person is really limited, but we are now filled with too much stuff in our head.

T: let's look at the second problem, let us rank a sequence of the four modes we have used—paper journal, e-journal, audio reflection, and collaborative reflection.

S2: I think the best one would be collaborative reflection. Well, because uh in the process of discussion, you may think about the problem from your own perspective and from other people's perspective, which can form a more complete system by absorbing others’ views. it is conducive. In addition, by collaborative reflection of the article,

You can have a better understanding of these parts that confused you, or find out whether your understanding is right or wrong by comparing with others. Such activities bring a sense of participation. In all, we may promote our understanding by being exposed to various thoughts and understandings.

Then I think the second should be the audio reflection, I think talking will be more logical than writing. For audio reflection, you can redo it or reorganize it if your feel certain part is not satisfactory or perfect. You can also revisit it after some time to see your previous ideas. I think paper journal is also very good way, as good as audio reflection. Anyway, writing down is more impressive. Also speaking is beneficial to our oral proficiency.

T:Yes that is to say, you are practicing two language skills at the same time: speaking and listening. It is an integrated practice.

S2: Yes, Organized and flexible.

S2: And then the last one would be e-journal reflection, because it is more impersonal.

T:Yes indeed it is not so intimate as paper journal.

S2:But it is convenient indeed.

S2:well, the function of prompt is another problem. In fact, there are advantages and disadvantage. sometimes it is convenient, but if you always rely on it, then you may forget how to spell words. This happens all the time for the Chinese characters. This is really quite sad.

T: Then the third one, in the process of completing reflection, have you encountered any problems.

S2:The largest challenges is that I am inclined to forget what I read. Another problem is the connection problem in the reading process. Well, if the article is short, then I could read it through and then finished the reflection at once. But if the reading process was interrupted (for example, different words will delay the reading a lot),then I needed to repeat the reading several times before I could finish the reflection.

T:Yes, this is an important point. Reading is often interrupted by various factors, say, smartphone distraction. I am also troubled by smartphone distraction.

S2: Yes, and sometimes self-control is not enough.

T:Really everyone is facing this problem. Whether you work or study via your smartphone, strong self-control is needed to cope with the distraction problem. Okay, I get it, so let's see if there are any suggestions or ways to improve this reading program or this mode of reading reflecting.

S2: I think in terms of reading, if it's a long-term project plan, the first thing you should do is to keep the length of the articles within certain pages, and choose passages with less verbs. Completion of easy passage and reflection may give students a sense of accomplishment and want to challenge longer passages.

T:Is it better if we limit the scope of the passage, say, in terms of the difficulty?

Find some suitable for our difficulty of this kind.

S2: Yes, I think so. The passages should not be too long or too difficult. The passages we read in various exams are all not too long and don’t require too much patience. Also in certain context we can figure out its meaning without reading the previous and after part in the whole article. But now for the passges on apps, I can’t make out the logic for the long paragraph. This is the first time we read such passages systematically on apps and short and confined articles are suitable.

T:Yes, We still need to progress step by step, right?

T:Well, then, Is there any advice on completing reading reflection?

S2: Well, I think that the reflection is a good idea. In the past I also tried reflection, when we read some novels, I generally divided it into chapters to read, and grasped the main idea, and then after that the second time I read by checking difficult words and reflected. The second reading and reflection help me understand better in some ways, but I am not sure as I didn’t do this practice for long. But whether the reflection is useful or not, I am confused as I didn’t know to what extent it enhanced my understanding.

T:Well I think that for this kind of article, especially difficult articles, more reading is of great importance. you may catch the writer’s implied messages through repeated reading.

As long as we read, we may benefit from it. So a good reading habit is very importance for us.

S2:As we are busy in study or other things, we actually don’t spare too much time reading those stuff. people are not very interest in it, to be honest.

T:We still need time to form good reading habits. Also it may be better to pick some good material for everyone read. Thanks so much for your ideas, which gave me much inspiration.

S2

T: Then we mainly say, that is, a little bit about the personal feelings on line, the first, do you think whether we need a certain kind of mobile reading supervision, or is actually a process management. Or do we just need a kind of, say, daily check-in.

S2: I think, um, that depends. Well, if one is really interested in it, he doesn't need to be monitored. If he is forced or, um, not by his own will, one may need some monitoring.

T: Well, do you think we have this kind of habits now about going to read things on the internet by ourselves?

S2: Well, yes. Yeah. There are a lot of people who like to watch short films about history or, um, science fiction or something like that. This kind of fiction-like reading, um, that's good to read in this way.

T: Well, yes, in fact, I think we should have such a habit, in fact, all the hard work we have done, is for the purpose that we can help you develop a habit like this. As long as there is this habit, there will be constant contact. In fact, if there is no such habit, any such external measures are actually useless and will be counterproductive. if you impose such things on students, you are likely to revoke rebellious feeling among students, but it is not useful. Then so much for this question.

T: Well, there's another problem, is there any use for this kind of reflection after reading the article? Especially after we read this kind of English article, if it is necessary to do this kind of reflection activity?

S2:I think yes, definitely, there is some necessity to reflect on reading process, because um, the first thing is that for English, it is not a language that we come into contact with very often, um unfamiliar language, so when you read the article, you may not understand very well what he is saying, maybe you read and understand the meaning of each sentence, but when you put it together then, it will not form a system, um, so reflecting on the words or texts is definitely enhancing or strengthening the understanding of the article, very important part, um.

T:Yes, in fact I also think so, that now in fact we are still poor readers, especially if in the future you want to read some, for example, more professional or technical passages. In our general reading class, students will read some classic novels or articles, then you will find each word you may know, or every sentence you can translate out, but you can’t understand what the whole passage mean.

Well, one needs to understand the whole thing. And then in addition you may also need a little, deeper understanding for certain detailed part. The first thing you need to do is to have a deeper understanding of some of the points and so on. This may need us to constantly to remember some things and notetaking are necessary at times. you can simply remember, for example, after reading this paragraph, what the writer wanted to convey. Maybe after summarizing it, you may have a better understanding. Anyway, what we write, is called reading reflection journal, in fact, the biggest a role is to deepen your memory. Another is to strengthen your understanding of the whole article. It is easy to forget when we read more, so reflection at different stage may help us remember and understand the passage better.

S2: Well, yes, that's it. I think the memory of a person is really limited, but we are now filled with too much stuff in our head.

T: let's look at the second problem, let us rank a sequence of the four modes we have used—paper journal, e-journal, audio reflection, and collaborative reflection.

S2: I think the best one would be collaborative reflection. Well, because uh in the process of discussion, you may think about the problem from your own perspective and from other people's perspective, which can form a more complete system by absorbing others’ views. it is conducive. In addition, by collaborative reflection of the article,

You can have a better understanding of these parts that confused you, or find out whether your understanding is right or wrong by comparing with others. Such activities bring a sense of participation. In all, we may promote our understanding by being exposed to various thoughts and understandings.

Then I think the second should be the audio reflection, I think talking will be more logical than writing. For audio reflection, you can redo it or reorganize it if your feel certain part is not satisfactory or perfect. You can also revisit it after some time to see your previous ideas. I think paper journal is also very good way, as good as audio reflection. Anyway, writing down is more impressive. Also speaking is beneficial to our oral proficiency.

T:Yes that is to say, you are practicing two language skills at the same time: speaking and listening. It is an integrated practice.

S2: Yes, Organized and flexible.

S2: And then the last one would be e-journal reflection, because it is more impersonal.

T:Yes indeed it is not so intimate as paper journal.

S2:But it is convenient indeed.

S2:well, the function of prompt is another problem. In fact, there are advantages and disadvantage. sometimes it is convenient, but if you always rely on it, then you may forget how to spell words. This happens all the time for the Chinese characters. This is really quite sad.

T: Then the third one, in the process of completing reflection, have you encountered any problems.

S2:The largest challenges is that I am inclined to forget what I read. Another problem is the connection problem in the reading process. Well, if the article is short, then I could read it through and then finished the reflection at once. But if the reading process was interrupted (for example, different words will delay the reading a lot),then I needed to repeat the reading several times before I could finish the reflection.

T:Yes, this is an important point. Reading is often interrupted by various factors, say, smartphone distraction. I am also troubled by smartphone distraction.

S2: Yes, and sometimes self-control is not enough.

T:Really everyone is facing this problem. Whether you work or study via your smartphone, strong self-control is needed to cope with the distraction problem. Okay, I get it, so let's see if there are any suggestions or ways to improve this reading program or this mode of reading reflecting.

S2: I think in terms of reading, if it's a long-term project plan, the first thing you should do is to keep the length of the articles within certain pages, and choose passages with less verbs. Completion of easy passage and reflection may give students a sense of accomplishment and want to challenge longer passages.

T:Is it better if we limit the scope of the passage, say, in terms of the difficulty?

Find some suitable for our difficulty of this kind.

S2: Yes, I think so. The passages should not be too long or too difficult. The passages we read in various exams are all not too long and don’t require too much patience. Also in certain context we can figure out its meaning without reading the previous and after part in the whole article. But now for the passges on apps, I can’t make out the logic for the long paragraph. This is the first time we read such passages systematically on apps and short and confined articles are suitable.

T:Yes, We still need to progress step by step, right?

T:Well, then, Is there any advice on completing reading reflection?

S2: Well, I think that the reflection is a good idea. In the past I also tried reflection, when we read some novels, I generally divided it into chapters to read, and grasped the main idea, and then after that the second time I read by checking difficult words and reflected. The second reading and reflection help me understand better in some ways, but I am not sure as I didn’t do this practice for long. But whether the reflection is useful or not, I am confused as I didn’t know to what extent it enhanced my understanding.

T:Well I think that for this kind of article, especially difficult articles, more reading is of great importance. you may catch the writer’s implied messages through repeated reading.

As long as we read, we may benefit from it. So a good reading habit is very importance for us.

S2:As we are busy in study or other things, we actually don’t spare too much time reading those stuff. people are not very interest in it, to be honest.

T:We still need time to form good reading habits. Also it may be better to pick some good material for everyone read. Thanks so much for your ideas, which gave me much inspiration.

S3

T: Today we talked a little about your opinion about this reading program and reading reflection. Let us see the first question, do you think whether we need a certain kind of mobile reading supervision, or is actually a process management. Or do we just need a kind of, say, daily check-in.

S3: I think certain supervision is necessary. Various activities are available for students on the campus. Besides, mobile devices serve various functions such as watching films or communication. Therefore, if students don’t have strong self-control, they might indulge themselves in playing on mobile devices rather than devote themselves to reading on apps. Daily check-in on apps may be completed without reading the contents on apps, so I think certain supervision is necessary.

T: Yes, I agree. The purpose of the supervision is not to monitor our learning but to encourage students to pay more attention to the activity and form a good learning habits. Do you have the habits of reading English passages online in daily life?

S3: Yes, I think so. We often watch Ted for speeches, but we didn’t learn reading systematically in this way。

T: That is good habit. We can share some good resources as it is not easy to find suitable reading materials online. Then a related question, do you think reading reflection is beneficial to your reading proficiency?

S3: If if reflection is not a required task, but sth we do as we wishes, I think it would be beneficial. You can help you understand the writer’s message better and help us understand our own thoughts better, It is meaningful to read what we write in the previous time to recollect our thought.

T: reading with reflection is much more impressive than simply reading passages. Reflection is a constant thinking process and useful for us to organize our ideas. It is especially useful when you read some long classic novels or other works.

T: let's look at the second problem, let us rank a sequence of the four modes we have used—paper journal, e-journal, audio reflection, and collaborative reflection.

S3: the preference rank I give is like this : paper journal, audio reflection, collaborative reflection, e-journal reflection.

T: could you explain a little about your preference?

S3: I feel by paper journal I can record what I read and deepen my memory. Also paper reflection can convey your thoughts better. In addition, writing things on more is more casual and real compared with typing. For typing, you will always consider what you will say next during the typing process and I kind of dislike it.

T: yes. I feel most of our classmates dislike e-journals. Maybe the operation is troublesome and not convenient. Also some students reported it as being impersonal.

T: How about collaborative reflection? Is it useful for reading?

S3: quite good. We can share our ideas with others and the clash of ideas will spark new thought and inspirations. I think it is interesting. You can also notice things you overlooked by listening to others’ understanding.

T: I see. We may discover many interest points if we read passages and understand it from different perspectives.

T: Then the third one, in the process of completing reflection, have you encountered any problems?

S3: For me the largest challenge is the vocabulary problem. It is hard to understand a passage and enjoy the reading with too many new words in it.

T：So the largest problem in the reading program is how to select suitable reading passage for us. If the passages are interesting and suitable, I believe all students are willing to read.

S3：Yes, If you can be into the activity, then you may gradually discover sth interesting or beneficial. But if you are frustrated at the very beginning, then nothing can be done. Also another problem is the length of the passage, an article with many pages will bore me and be dropped it in the middle.

T: Then How many pages will you read for each time?

S3: maybe 5 to 6 pages on the smartphone screen, sever hundred words perhaps.

T: I see. Then it is advisable to find some short and interesting passages to read for better reading effect. Let is come to the last question, if there are any suggestions or ways to improve this reading program or this mode of reading reflecting.

S3: my suggestion is that we should give students more choices on the kinds of articles they read. Different students may prefer different kinds of stories.

T: but there is a problem, if students read different stories, then how they can discuss them?

S3: I think in each group, group members can make a mini presentation about what they read so that others can have a rough understanding about it and maybe develop interest in the book later. Also besides written reflection or presentations, we can also use video materials to complement the reading process. For example, we can supply the reading passage with related video or audio materials to impress and interest the readers. Such materials are more likely to attract and focus learner’s attention during the learning process.

T: I see, very good opinions, Thank you very much.

S4

T:Today we talked a little about your opinion about this reading program and reading reflection. Let us see the first question, do you think whether we need a certain kind of mobile reading supervision, or is actually a process management. Or do we just need a kind of, say, daily check-in.

S4: I thought it is necessary. If you only require students to check in on apps, some problems may emerge. For example, some check in on the app, but he didn’t read the articles. in other words, without proper supervision and management, students may skip the reading for various reasons such as negligence or lack of time.

T: so supervision do benefit students in some ways. At least it can help students form a good reading habit, which is the primary task of this program. The mobile reading habit is of importance for our study or future work. By the way, do you often read passage online?

S4: seldom. I don’t have much patience to read those stuff. Sometimes I read them in some fragmented time, such as moments before falling asleep on bed or breaks during classes. But you either feel sleepy soon or start sth else after the short time, so the time devoted to reading online was very limited.

T: Then a second question, do you think reflection after mobile reading is useful or not?

S4: I think it is useful to some degree. We all tend to forget after we read, but if you write down what your feel and though, then after some time when you refer to your reflection again, new ideas may be inspired.

T: I agree. Our opinions may vary with time. In addition, I thought reflection may deepen our memory about what we read. Nowadays we are filled with all kinds of messages and we are likely to be forgettable more than ever.

T: let's look at the second problem, let us rank a sequence of the four modes we have used—paper journal, e-journal, audio reflection, and collaborative reflection.

S4: I like paper reflection the most. I feel it convenient and kind of ceremonial. For some people they tend to record their feelings by writing it down. If you reflect by recording your understanding, you have to consider the location problem. For example, library will not be a good place to make audio reflection.

S4: For collaborative reflection, the sharing and clash of ideas may lead to integration of understandings. But there also exists problems. People read different articles, which make it hard to discuss and reflect. Also the time and location of discussion is a problem worth attention. We need to find time and place that is acceptable for all group members.

T: yes. Group discussion involves arrangement and distribution of work. It needs some coordination. compared with individual reflection, collaborative reflection is a ratively troublesome one.

T: how do you feel about e-journal reflection?

S4: e-journal is also convenient. But the problem with it is that we may delete the reflection we stored in smartphone or mobile devices or lost it because we forget where we store it.

T： yes, that is a problem.

T: Then the third one, in the process of completing reflection, have you encountered any problems?

S4: one problem is that the passages I read didn’t attract me. Another problem is that I don’t prefer long passages on the apps as a result of fast pace life in the modern society. But the most serious problem for me it the vocabulary problem, which greatly hindered passage understanding.

T: yes, the length of the passage and vocabulary do affect our reading process. Then how many pages would you read for one time?

S4: one page, maybe.

T: well, pretty short passages.

S4: That also depends on the content of the passage. If it attracts me, I will read several times.

T: So interest is really important for mobile reading. Good passages will spark our interest and help students into the reading activities. But it is really hard to discover suitable passage on the internet as there are huge amount of resources.

T: what kind of passage do you prefer in mobile reading, news or short articles or stories?

S4: based on our language proficiency, I think stories are more suitable. It is interesting and can attract students. News are rather difficult to understand as there are many terms.

T: I agree. It needs a lot of practice to understand news items. In the past students in language majors always listen to BBC or VOA news in the morning through radios. But now few people use it to practice listening.

T: then so let's see if there are any suggestions or ways to improve this reading program or this mode of reading reflecting.

S4: I think for reading reflection, requirements like time and length should not be stipulated. Students should be encouraged to write at will.

T: but if we have requirement at all, will you read articles on the internet by yourself?

S4: sometimes maybe. If I feel I need to improve my knowledge and reading skills, I will read. But maybe I will be frustrated by boring articles.

T: I see. So we need to find some good platforms and good resources to attract students and develop the learning interest, isn’t it?

S4: yes. Reading is important in spit of difficulties in the reading process.

T: Thank you for your ideas. I understand much about you young people.

S5

T: Today we talked a little about your opinion about this reading program and reading reflection. Let us see the first question, do you think whether we need a certain kind of mobile reading supervision, or is actually a process management. Or do we just need a kind of, say, daily check-in.

S5: That depends. Some people like reading by nature while others dislike reading since they were young. In addition, different people favor different kinds of reading passages. Take me as an example, I am totally not into articles about history.

T; Then are there some ways to encourage mobile reading? Nowadays people generally read less. There are huge amount of English reading resources on the internet, but not many students have the habit of mobile reading.

S5: the major problem of mobile reading is the distraction problem. When we pick up our mobile devices, the first thing we do is always watching live screaming, short videos and check messages from friends. Reading will never be the top priority. Even in the reading process we are often distracted from study. It is hard to deal with it. But I think the experience we had in the morning reading exercise can be of some help. We are recommended with some short stories about current news and it is easy to read and follow the ideas. Gradually we develop some interest and would like to try some longer stories. Some experiences from the extensive English reading class might also be useful. Our teacher guided us to read Oscar wilde’s novel and appreciate his humorous writing style. I like his writing and then want to read more of his novels. In all, three ways might be used as stimulus--a step-by-step reading process, proper guidance from teachers, and most of all students’ willingness to read.

T: I agree, the most important thing is the learning interest.

S5: I loved reading when I was young, but now I seldom think of reading when I started my smartphone.

T: this is a common social phenomenon. the deep penetration of smartphone in our life is almost everywhere. People read less paper books, and receive much more information from the internet. so if we can form the habits of mobile English reading, it will be beneficial to our future study and work.

T: Then a second question, do you think reflection after mobile reading is useful or not?

S5： very useful. Reflection is the internalization of knowledge, which can help us better understand the structure and inner meaning of the passage. Meanwhile we should complete reflection soon after we finish reading or we will forget what we read, especially for the English passages.

T: Yes. We are more forgettable than before. Reflection is beneficial to the understanding of long passages. Sometime we read one page but we can’t connect them logically and understand the meaning. Reflection is useful for such kind of situations.

S5: I prefer paper reflection the most, and audio reflection comes next。 I think the two are similar in that they are the organization of internalization of knowledge in our mind. The third one is group collaboration. I think the clash of ideas will bring new understanding and new perspectives. But we must sort out our ideas first. E-journal reflection is the least preferred mode for it. One problem with it is the prompting function. The other is that typing is not suitable for long passage reflection as I can’t figure out the logic between paragraphs when typing. I feel typing is only suitable for short note, not long reflection.

T: typing itself may take up much of our attention, thus affecting the flow of our mind.

S5: yes, I feel the mind was greatly affected.

T：Then the third one, in the process of completing reflection, have you encountered any problems?

S5: the largest problem is the vocabulary problem. Passages with too many new words affect understanding and frustrate interest. Besides, the thinking logic and ways of expression are different between English and Chinese, which also caused trouble for the passage understanding.

T: I see. So it would be better if there is passage ranking concerning the difficulty. It is really a large challenge on how to select suitable passages.

Concerning the choice of passage, do you like to choose articles by yourself or read articles recommended by teachers?

S5: I think at present I prefer recommendations from teachers. without proper guidance we may choose sth too simple or too difficult, thus losing interest in mobile reading. After a period of guidance we are experienced with this kind of reading practice and will be more confident in choosing articles by ourselves.

T：Let is come to the last question, if there are any suggestions or ways to improve this reading program or this mode of reading reflecting.

S5：I think reflection is beneficial to our study although some classmates dislike it. I recommend a gradual learning process starting from writing fragmented short notes. After some practice students may start to write long reflection with logic.

T: I see. We start with sth informal and casual and develop students’ interest and habits. A good idea. Thank you very much

S6-10

T: Today we talked a little about your opinion about this reading program and reading reflection. Let us see the first question, do you think whether we need a certain kind of mobile reading supervision, or is actually a process management. Or do we just need a kind of, say, daily check-in.

S6: if students are required to check-in only, maybe they will only do the check-in without reading the passage.

T: That is to say, the function of daily check-in is not strong enough to stimulate students to read. In essence, the purpose of supervision is not monitor the students, but to help them develop a good learning habits.

S7: I agree, if only daily check-in is required, then many will only log in and check in without further reading the passages.

S8: supervision and process management is necessary I think

S9: I agree with s8

S10: I agree with s8

T: Yes, that is an important point. Then a second question, do you think reflection after mobile reading is useful or not?

S6: It is useful. If you don’t write reflection, you will not know how much you remember or how much you understand

T; Yes, sometimes the words we read didn’t form meaning unless you reflect them after reading.

S10：yes. Sometimes I couldn’t remember anything after the first reading, as if I hadn’t read at all.

S7: reflection is part of the reading process in my opinion, an accumulation process. It is necessary as I will not know what I read after one day if I didn’t make any reflection.

S8: I think reflection is your own summary of the passage read and your understanding about it.

S9: I dislike reading reflection. These news I read didn’t lead to deep impression and reflection. But as I had to finish the assignment, I would exaggerate and make up the story a little.

T: so you think new items, compared with essays and stories, are not suitable for reflection, aren’t they?

S9: yes, I think so. For some simple articles, I can learn some new words or new patterns. I don’t think reflection is needed in reading these articles.

T: it makes sense in some ways。Maybe it is better to confine the reading resources to some articles that inspire reflection easier than news.

T: let's look at the second problem, let us rank a sequence of the four modes we have used—paper journal, e-journal, audio reflection, and collaborative reflection.

S6: my preference in order is collaborative reflection, paper reflection, audio reflection, and e-journal reflection. Recording is a process of constant perfecting your works by remaking it.In collaborative reflection, several students may share their opinions and them summarize a group opinion, which is more comprehensive than individual opinions. Paper reflection and audio reflection can be conducted together to play its potential to full capacity. E-journal reflection is not convenient to operate.

S7: my preference in order is audio reflection, paper reflection, collaborative reflection and e-journal reflection. I prefer audio reflection in that it can practice speaking as we don’t have much opportunities to speak in daily life. Paper reflection can deepen the memory and practice the spelling of English. For collaborative reflection if all members can record their opinion for sharing and then make a summary after the discussion, it will be beneficial. But if only the person who is responsible for presentation do the work, it will not be effective in promoting reading. E-journal reflection is not useful.

T: yes, collaboration works only when everyone participates in it. For e-journal, I think many students dislike typing journal partly because of the fact we don’t use digital document a lot in our daily life and the function of WPS software we use such as error correction and editing is not powerful enough. So many felt typing was not convenient.

S8: my preference in order is collaborative reflection, paper reflection, audio reflection, and e-journal reflection. Collaborative reflection allow everyone the opportunities to express his opinions. We can gain more from different understanding and summary. Audio reflection can practice different language skills. Paper reflection exercise spelling skills. Typing is also good, but in some ways not very convenient. What is more it didn’t help improve the problem that we forget the spelling of words.

S9: my preference in order is audio reflection, collaborative reflection, paper reflection, and e-journal reflection. Audio reflection provides more chance of speaking English for us as we don’t have many opportunities to practice it. Collaborative reflection allow us to her others opinion and contribute to learning. I dislike typing as it is unconvenient.

S10; my preference in order is paper reflection, audio reflection, collaborative reflection and e-journal reflection. Each has their own features. Paper reflection help practice the spelling. paper reflection and audio reflection can be combined to practice multi-skills such as listening, speaking and spelling. In collaborative reflection, some students may not actively engage in the discussion and collaboration due to the distribution of work. e-journal reflection is not very useful and I dislike this way.

T: Okay, I get it, so let's see Then the third one, in the process of completing reflection, have you encountered any problems?

S6: it is not convenient to read passage via smartphones. Also it strained eyes.

T: yes, that is a big problem, paper books are more comfort to read. But it is a fact that we spend a large amount of time on our phones. So if we can form the habits of sparing some time on mobile reading, that will be very beneficial.

S7: I usually chose passages by the titles, but often the content is either to easy or too difficult, a lot of time is wasted on searching. Also vocabulary problem is a hinder for passage understanding.

T: maybe it is applicable that we recommend some good news items or stories to students.

S8: there are too many new words in the passages and I spent much time checking their meanings. In addition, passages without translation are hard and discourage reading.

T: for extensive reading, it is not necessary to check the meaning of every new words, otherwise you will be always disrupted and lose interest in reading.

S9: I don’t think reflection bring benefit for my study. It is better to note down useful words, phrase or patterns you encounter in the reading process. When you insisted on doing so, you will have a large accumulation soon and can also improve your study.

S10: I can’t find suitable materials to read. Many apps charge for articles they offer. Maybe in the future study we can find an app that recommend suitable reading passages for free every day.

T: yes, charges by apps is troublesome. Also searching for materials in huge amount of online resources is really hard.

T: Okay, I get it, so let's see if there are any suggestions or ways to improve this reading program or this mode of reading reflecting.

S6: I think if reflection is an voluntary activity not compulsory assignment, we may enjoy the process more and participate more actively in it.

T: I see. The purpose of compulsory tasks is to cultivate our reading habits in the process. By the way, do you often read passages on mobile apps?

S6: not often, except for finishing assignments.

T: I think it is necessary to recommend good apps and resources to our classmates

S7:I think the time for distributing and collecting the assignments should be fixed, such as a set day every two weeks, so we can make better preparation.

T; good ideas.

S8: I think we should be in a rush for mobile learning, we should first let students be familiar with it and form the habits of mobile reading.

T: I agree.

S9: I think we can read some shared passages so that when you feel puzzled by certain parts, you can refer to others for help.

T: do you prefer novels or short passages?

S9: novels or interesting short articles, but articles about technology is not to my taste.

T: I see. so short interesting articles or good novels are preferable in the mobile reading process.

S10：you can share us with good resources you find and recommend them through social media such as wechat or QQ, which is more convenient than Chaoxing platform

S10: I think it is useful to add some comprehension questions for the reading articles.

T: then maybe we can recommend some passages with scaffolding questions.

T； I see, good points. Thank you all for you ideas.
